# Supplementary material for: An organoboron compound with a wide absorption spectrum for solar cell applications
Source: Royal Society of Chemistry journal article supplement (doi:10.1039/c7cc07494h), 2017-01-01
Supplement: c7cc07494h1.pdf [file c7cc07494h1.pdf]

## Supporting Information

*for*

### **An Organoboron Compound with Wide Absorption Spectrum for Solar Cell Application**

Fangbin Liu, Zicheng Ding, Jun Liu\*, Lixiang Wang

State Key Laboratory of Polymer Physics and Chemistry

Changchun Institute of Applied Chemistry

Chinese Academy of Sciences, Changchun 130022, P. R. China

Email: [liujun@ciac.ac.cn](mailto:liujun@ciac.ac.cn).

#### ***Contents***

1. Materials and synthesis
2. OSCs device fabrication and measurement
3. TGA
4. DSC and XRD
5. DFT calculation results
6. AFM and TEM images
7. Charge mobility measurement
8.  $J_{sc}$  versus light intensity
9.  $J_{ph}$  versus effective voltage
10. Chemical structure of PTB7-Th
11. The absorption spectrum of blend film
12. References

## 1. Materials and synthesis

**Materials.** Commercially available solvents and reagents were used without further purification unless otherwise mentioned. Toluene and tetrahydrofuran were purified by distillation under Argon prior to use. PTB7-Th was purchased from 1-Material Chemscitech Inc. (Canada). 5,5'-dibromo-[2,2'-bipyridine]-3,3'-diamine, 5-(4,4,5,5-tetramethyl-1,3,2-dioxaborolan-2-yl)thiophene-2-carbaldehyde, and 2-(3-oxo-2,3-dihydro-1H-inden-1-ylidene)malononitrile were prepared according to the literature methods.<sup>[1,2]</sup>

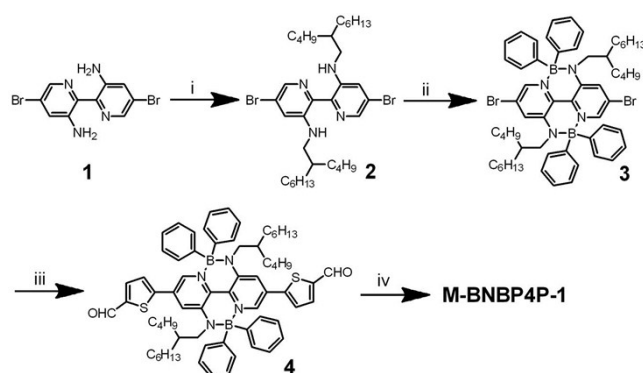

**Scheme 1.** Synthetic route of **M-BNBP4P-1**.

**Synthesis of 5,5'-dibromo- $N^3,N^3'$ -di-2-hexyldecyl-[2,2'-bipyridine]-3,3'-diamine (**2**):** Under argon, to a solution of 5,5'-dibromo-2,2'-bipyridine-3,3'-diamine (**1**) (1.00 g, 2.92 mmol) in THF (45 mL) was added *n*-BuLi (2.4 M in hexane, 2.7 mL, 6.43 mmol) dropwise at  $-78$  °C. After the mixture being stirred at  $-78$  °C for 1 h, 1-iodine-2-butyloctane (1.90 g, 6.43 mmol) was added and the resulting mixture was stirred for 10 h at  $75$  °C. After removal of the solvents in reduced pressure, the residual was purified by silica gel column chromatography with  $\text{CH}_2\text{Cl}_2/\text{hexane}=1/5$  as the solvent to give **2** as light yellow oil. Yield: 798 mg, 55%.  $^1\text{H}$  NMR (400 MHz,  $\text{C}_6\text{D}_6$ ,  $25$  °C):  $\delta$  10.24 (t,  $J = 3.6$  Hz, 2H), 8.01 (d,  $J = 1.6$  Hz, 2H), 7.08 (d,  $J = 1.6$  Hz, 2H), 2.74 (m,  $J = 4.0$  Hz, 4H), 1.57 (m, 2H), 1.43-1.17 (m, 32H), 0.97-0.87 (m, 12H).  $^{13}\text{C}$  NMR (400 MHz,  $\text{C}_6\text{D}_6$ ,  $25$  °C):  $\delta$  147.41, 138.20, 132.17, 120.37, 119.13, 46.08, 37.66, 32.91, 32.64, 32.27, 30.17, 29.43, 27.21, 23.49, 23.15, 14.42, 14.36. Anal. Calc. for  $\text{C}_{34}\text{H}_{56}\text{Br}_2\text{N}_4$ : C, 60.00; H, 8.29; Br, 23.48; N, 8.23. Found: C, 60.53; H, 8.01; Br, 23.22; N, 8.24

**Synthesis of 3:** A mixture of **2** (750 mg, 1.10 mmol), BPh<sub>3</sub> (1.330 g, 5.51 mmol) and toluene (30 mL) was stirred at 120 °C for 8 h. After removal of the solvents under reduced pressure, the residual was purified by silica gel column chromatography with CH<sub>2</sub>Cl<sub>2</sub>/hexane=1/5 as the eluent. The compound **3** was obtained as a red solid. Yield: 930 mg, 84%. <sup>1</sup>H NMR (400 MHz, C<sub>6</sub>D<sub>6</sub>, 25 °C): δ 7.83 (s, 2H), 7.53 (s, 2H), 7.25-7.10 (m, 20H), 3.24 (d, *J* = 5.8 Hz, 4H), 1.72 (m, *J* = 5.2 Hz, 2H), 1.36-0.97 (m, 32H), 0.96-0.76 (m, 12H). <sup>13</sup>C NMR (400 MHz, C<sub>6</sub>D<sub>6</sub>, 25 °C): δ 149.80, 134.65, 132.10, 131.03, 127.91, 127.05, 126.14, 121.23, 52.76, 36.21, 32.40, 32.19, 32.11, 30.03, 29.04, 26.88, 23.36, 23.06, 14.37, 14.24. Anal. Calc. for C<sub>58</sub>H<sub>74</sub>B<sub>2</sub>Br<sub>2</sub>N<sub>4</sub>: C, 69.06; H, 7.39; B, 2.14; Br, 15.84; N, 5.55. Found: C, 68.81; H, 7.67; B, 2.33; Br, 15.53; N, 5.66

**Synthesis of 4:** A mixture of **3** (441 mg, 0.437 mmol), 5-(4,4,5,5-tetramethyl-1,3,2-dioxaborolan-2-yl)thiophene-2-carbaldehyde (261 mg, 1.093 mmol), Pd(PPh<sub>3</sub>)<sub>4</sub> (51 mg, 0.044 mmol), THF (30 ml), aqueous K<sub>2</sub>CO<sub>3</sub> (2M, 0.66 mL, 1.311 mmol) was stirred under argon at 75 °C overnight. After cooled to room temperature, the reaction mixture was extracted with CH<sub>2</sub>Cl<sub>2</sub>. The organic phase was washed with water, dried over anhydrous Na<sub>2</sub>SO<sub>4</sub>, filtered and concentrated. The residual was purified by silica gel column chromatography with CH<sub>2</sub>Cl<sub>2</sub>/hexane=1/2 as the eluent to afford **4** as blue solid. Yield: 388 mg, 82%. <sup>1</sup>H NMR (400 MHz, C<sub>6</sub>D<sub>6</sub>, 25 °C): δ 9.30 (s, 2H), 8.02 (d, *J* = 1.2 Hz, 2H), 7.68 (d, *J* = 1.2 Hz, 2H), 7.50-7.25 (m, 20H), 6.63 (d, *J* = 3.2 Hz, 2H), 6.51 (d, *J* = 3.2 Hz, 2H), 3.50 (d, *J* = 2.4 Hz, 4H), 1.89 (m, 2H), 1.52-1.00 (m, 32H), 0.99-0.70 (m, 12H). <sup>13</sup>C NMR (400 MHz, C<sub>6</sub>D<sub>6</sub>, 25 °C): δ 181.85, 149.50, 144.81, 136.59, 135.08, 131.94, 130.57, 129.33, 127.31, 125.85, 120.36, 53.17, 36.71, 33.02, 32.69, 32.47, 30.42, 29.66, 27.53, 27.45, 23.75, 23.32, 14.62, 14.56. Anal. Calc. for C<sub>68</sub>H<sub>80</sub>B<sub>2</sub>N<sub>4</sub>O<sub>2</sub>S<sub>2</sub>: C, 76.25; H, 7.53; B, 2.02; N, 5.23; O, 2.99; S, 5.99. Found: C, 75.96; H, 7.83; B, 2.22; N, 5.20; O, 3.43; S, 5.36.

**Synthesis of M-BNBP4P-1:** A mixture of **4** (150 mg, 0.140 mmol), 2-(3-oxo-2,3-dihydroinden-1-ylidene)malononitrile (82 mg, 0.420 mmol), pyridine (0.5 mL) and toluene (15 mL) was stirred at 75 °C for 6 h. After cooled to room temperature, the mixture was poured into methanol (100 mL) and filtered. The solid was purified by silica gel column chromatography with CH<sub>2</sub>Cl<sub>2</sub>/hexane=2/1 as the eluent. Yield: 169

mg, 85%.  $^1\text{H}$  NMR (400 MHz,  $\text{C}_6\text{D}_6$ , 25 °C):  $\delta$  8.43-8.40 (m, 4H), 8.15 (d,  $J = 1.2$  Hz, 2H), 7.97 (d,  $J = 1.2$  Hz, 2H), 7.58 (m, 2H), 7.43 (s, 8H), 7.26 (m, 12H), 6.96 (t,  $J = 2.8$  Hz, 2H), 6.86 (m, 4H), 6.60 (d,  $J = 3.2$  Hz, 2H), 3.64 (d,  $J = 5.2$  Hz, 4H), 2.08 (m,  $J = 5.2$  Hz and 4.4 Hz, 2H), 1.57-1.15 (m, 32H), 1.05-0.81 (m, 12H).  $^{13}\text{C}$  NMR (400 MHz,  $\text{C}_6\text{D}_6$ , 25 °C):  $\delta$  187.81, 159.35, 152.80, 149.63, 145.24, 140.44, 138.20, 137.30, 136.69, 135.16, 134.33, 132.07, 130.74, 129.80, 128.54, 128.45, 128.35, 128.25, 128.16, 128.06, 127.36, 126.36, 125.51, 125.00, 123.76, 120.20, 114.84, 114.59, 72.19, 53.39, 36.89, 33.17, 32.84, 32.46, 30.51, 29.69, 27.49, 23.85, 23.39, 14.61, 14.59. Anal. Calc. for  $\text{C}_{86}\text{H}_{88}\text{B}_2\text{N}_4\text{O}_4\text{S}_2$ : C, 77.82; H, 6.68; B, 1.63; N, 4.22; O, 4.82; S, 4.83. Found: C, 77.12; H, 6.77; B, 1.98; N, 4.56; O, 4.32; S, 5.25.

**Characterization.**  $^1\text{H}$  and  $^{13}\text{C}$  NMR spectra were measured with a Bruker AV-400 (400 MHz for  $^1\text{H}$  NMR and  $^{13}\text{C}$  NMR) spectrometer with  $\text{C}_6\text{D}_6$  as the solvent and TMS as an internal standard. Elemental analyses were carried out using a VarioEL elemental analyzer. UV-vis absorption spectra were measured with a Shimadzu UV-3600 spectrometer. Thermogravimetric analysis (TGA) measurement was performed using a Perkin-Elmer 7 instrument under nitrogen flow at a heating rate of 10 °C  $\text{min}^{-1}$ . Differential scanning calorimetry (DSC) was performed at the heating/cooling rate of 10 °C  $\text{min}^{-1}$  with a TA Instruments Q2000. X-ray diffraction (XRD) measurement was performed using a Bruker D8 Discover reflector, and the sample was prepared by dropcasting with chlorobenzene solution (10 mg  $\text{mL}^{-1}$ ) on silicon substrate. Atomic force microscopy (AFM) was recorded with a SPA300HV (Seiko Instruments, Inc., Japan) in tapping mode. Cyclic voltammetry (CV) was performed using an CHI660a electrochemical workstation with a standard three-electrode system consisting of a cylindrical platinum working electrode, platinum mesh counter electrode and  $\text{Ag}/\text{Ag}^+$  reference electrode. CV measurements were carried out with the solution in anhydrous and deoxygenated dichloromethane with the concentration of 0.3 mM containing  $n\text{-Bu}_4\text{NClO}_4$  (0.1 M) as the electrolyte at a scan rate of 100  $\text{mV s}^{-1}$ . Ferrocene (Fc) was used as the standard. LUMO and HOMO energy levels were calculated from the equations:  $E_{\text{LUMO}} = -(E_{\text{red}} + 4.8)$  eV and  $E_{\text{HOMO}} = -(E_{\text{ox}} + 4.8)$  eV, where  $E_{\text{red}}$  and  $E_{\text{ox}}$  are the onset potentials vs.  $\text{Fc}/\text{Fc}^+$  of the reduction and oxidation processes,

respectively.

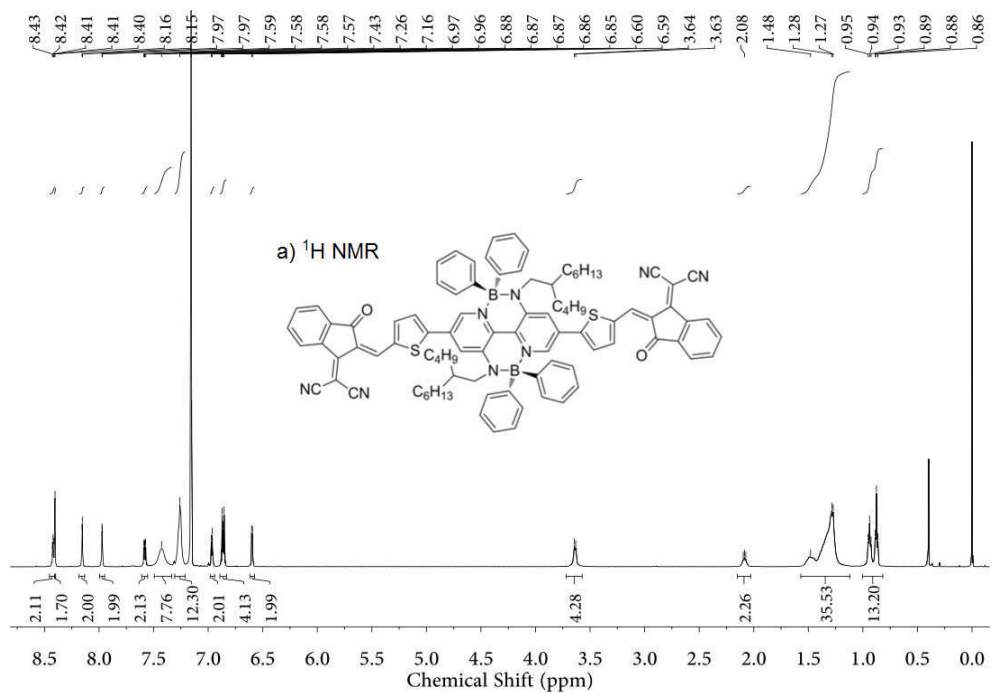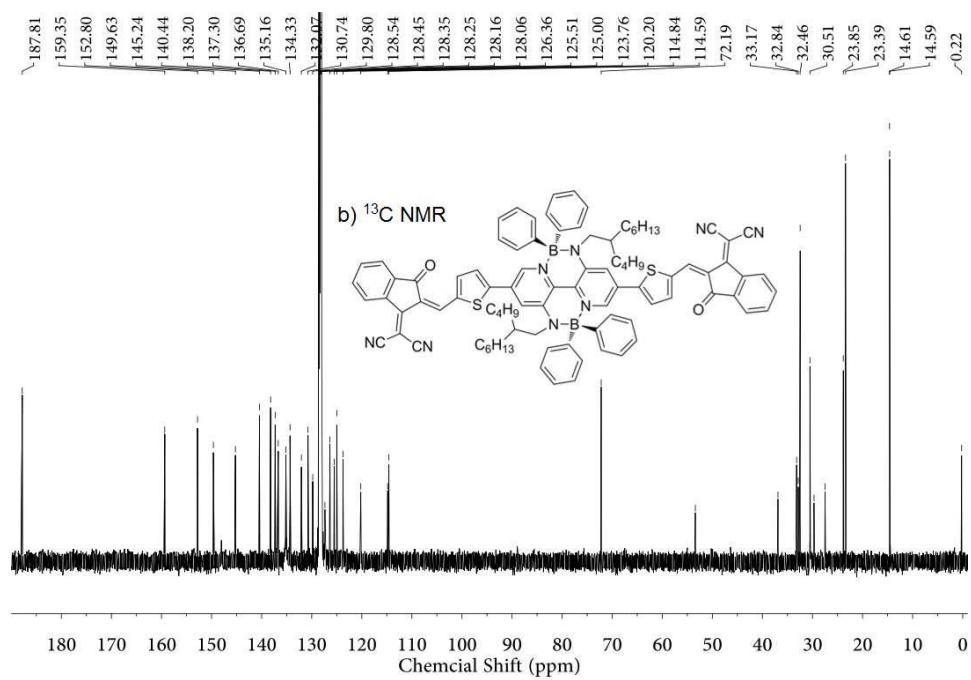

Figure S1. a)  $^1\text{H NMR}$  and b)  $^{13}\text{C NMR}$  spectra of M-BNBP4P-1.

## 2. OSCs device fabrication and measurement

OSC device was fabricated with an architecture of indium tin oxide (ITO)/ poly(3,4-ethylenedioxythiophene) doped with polystyrene sulfonate (PEDOT:PSS)/PTB7-Th:**M-BNBP4P-1**/Ca/Al. Patterned ITO glass substrates were cleaned by sequential ultrasonication in detergent, deionized water, acetone, and isopropyl alcohol, followed by heating at 120 °C for 30 min and UV-ozone treatment for 30 min. PEDOT:PSS (Clevios PVP Al4083 from H. C. Starck Inc.) with the thickness of 40 nm was spin-coated on the ITO substrates and annealed at 120 °C for 30 min. The active layer was spin-coated from the solution of PTB7-Th and **M-BNBP4P-1** in chlorobenzene (20 mg mL<sup>-1</sup>) at 2000 rpm, which resulted in the active layer thickness of 110 nm. Then the active layer was heated at 100 °C for 10 minutes. Finally, the device was transferred to a vacuum chamber and Ca (20 nm)/Al (100 nm) was sequentially deposited by thermal evaporation at the pressure of about  $2 \times 10^{-4}$  Pa. The active area of each device was 8.0 mm<sup>2</sup>.

The current density ( $J-V$ ) curves of the OSC devices were measured using a computer-controlled Keithley 2400 source meter under 100 mW cm<sup>-2</sup> AM 1.5G simulated solar light illumination provided by a XES-40S2-CE Class Solar Simulator (Japan, SAN-EI Electric Co., Ltd.). The EQE was measured using a Solar Cell Spectral Response Measurement System QE-R3011 (Enlitech Co., Ltd.), which was calibrated with a crystal silicon photovoltaic cell before use.

## 3. TGA

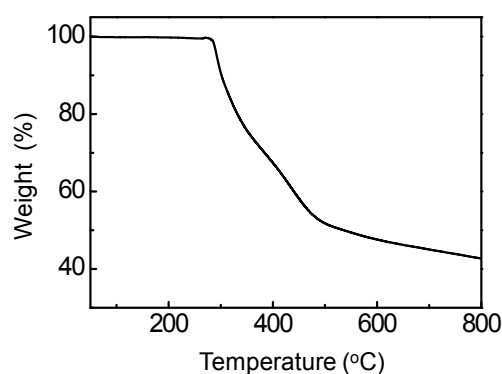

**Figure S2.** TGA plot of **M-BNBP4P-1**. In N<sub>2</sub> atmosphere, **M-BNBP4P-1** has good thermal stability with decomposition temperature ( $T_d$ ) at 5% weight loss of 288 °C.

## 4. DSC and XRD

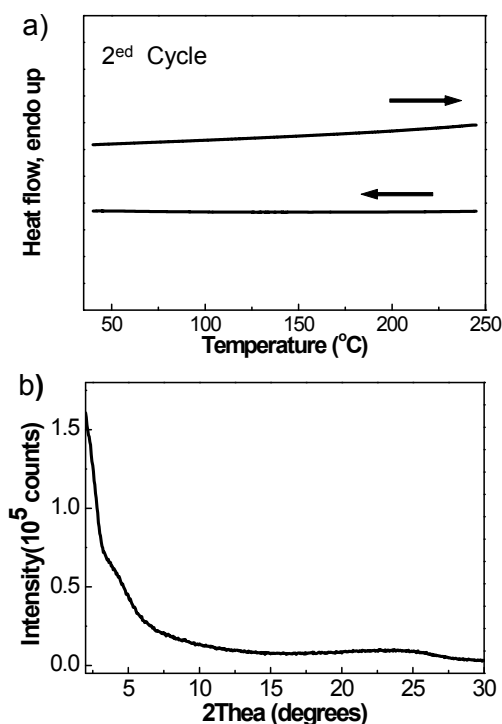

**Figure S3.** a) DSC curves and b) XRD pattern of **M-BNBP4P-1**. The second cycle of DSC measurement is shown.

## 5. DFT calculation results

All calculations were carried out using Gaussian 09. The geometry structure of **M-BNBP4P-1** were optimized by using DFT calculations (B3LYP/6-31G\*) and the alkyl chains have been replaced by methyl for clarity. Time-dependent DFT (TD-DFT) calculations were performed at the B3LYP/6-31G\* level of theory to more precisely elucidate the absorption of **M-BNBP4P-1**. TD-DFT calculation for the  $S_0 \rightarrow S_n$  transitions using the same functional and basis set were then performed based on the optimized structure at ground state.

### Excitation energies and oscillator strengths (Oscillator strength exceeding 0.1):

**Excited State 1:** Energy: 1.4610 eV Wavelength: **848.6 nm** Oscillator strength: **0.5406** Configurations: **HOMO→LUMO (0.70516)**;

**Excited State 6:** Energy: 2.3050 eV Wavelength: **537.9 nm** Oscillator strength: **0.2454** Configurations: **HOMO→LUMO+1 (0.69991)**;

**Excited State 7:** Energy: 2.4336 eV Wavelength: **509.5 nm** Oscillator strength: **0.8902** Configurations: **HOMO-4→LUMO (0.16303); HOMO-2→LUMO (0.57666); HOMO→LUMO+4 (-0.34843);**

**Excited State 10:** Energy: 2.5472 eV Wavelength: **486.8 nm** Oscillator strength: **0.4766** Configurations: **HOMO-8→LUMO (0.15556); HOMO-6→LUMO (-0.11425); HOMO-4→LUMO (0.56391); HOMO-2→LUMO (-0.28798); HOMO→LUMO+4 (-0.22390);**

Excited State 14: Energy: 2.6496 eV Wavelength: 467.9 nm Oscillator strength: 0.1388 Configurations: HOMO-8→LUMO (0.67600); HOMO-4→LUMO (-0.10907);

Excited State 27: Energy: 3.0073 eV Wavelength: 412.3 nm Oscillator strength: 0.1695 Configurations: HOMO-12→LUMO (0.13025); HOMO-9→LUMO+1 (0.51556); HOMO-7→LUMO+1 (-0.23619); HOMO-5→LUMO+1 (0.12836); HOMO-2→LUMO+2 (0.24602); HOMO-1→LUMO+2 (0.13538).

The transition energies and oscillator strengths simulated by the TD-DFT (B3LYP/6-31G\*) calculations resulted in two absorption bands for **M-BNBP4P-1**. The calculation results agree well with the measured absorption spectrum (Figure S4), and explain the relation between the molecule structure and absorption spectra. The electronic transition HOMO→LUMO (Excited State 1) corresponding to the energy of 1.4610 eV (wavelength at 848.6 nm) results in the low-energy absorption band in the absorption spectrum. The high-energy absorption band around 500 nm is attributed to six types of electronic transitions, HOMO-8→LUMO, HOMO-6→LUMO, HOMO-4→LUMO, HOMO-2→LUMO, HOMO→LUMO+1 and HOMO→LUMO+4 (illustrated by Excited State 6, 7 and 10). The main orbital configurations and electronic transitions of **M-BNBP4P-1** mentioned above were shown in Figure S5.



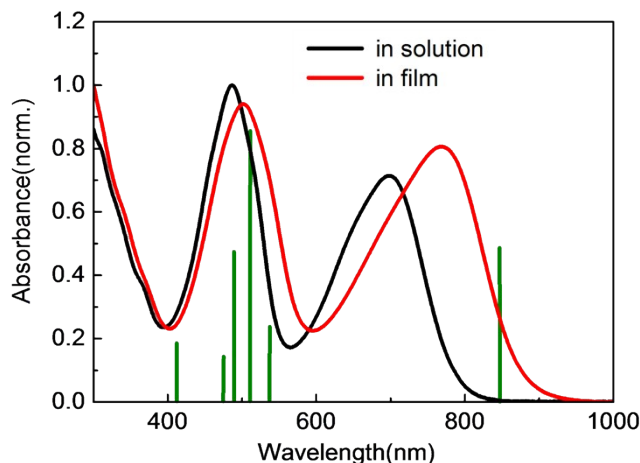

**Figure S4.** UV/Vis absorption spectra of **M-BNBP4P-1** in chlorobenzene solution and in thin film. The green bar shows the transition energies and oscillator strengths simulated by the TD-DFT (B3LYP/6-31G\*) calculations.

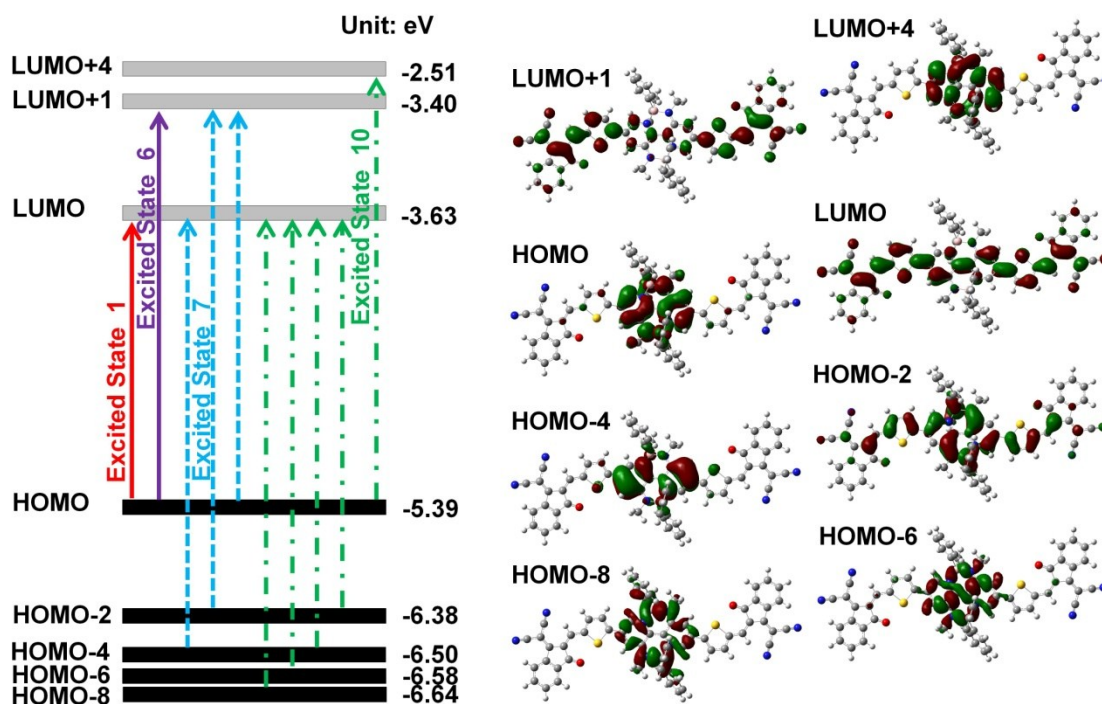

**Figure S5.** Schematic diagrams showing the main orbital configurations and electronic transitions of **M-BNBP4P-1** based on the TD-DFT (B3LYP/6-31G\*) calculation.

## 6. AFM images

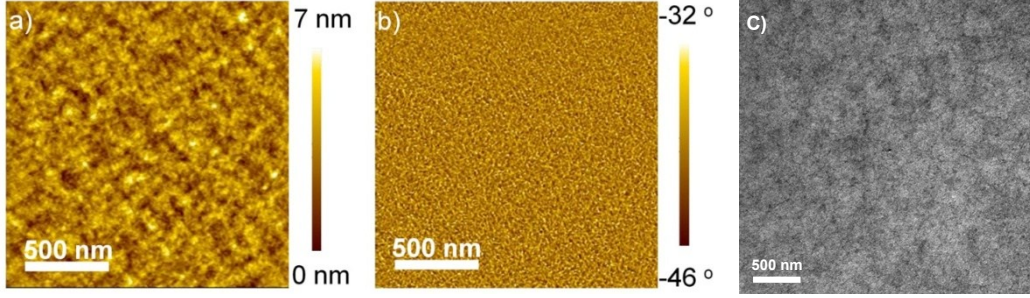

**Figure S6.** a) AFM height image, b) phase image and c) TEM image of the PTB7-Th:M-BNBP4P-1 blend film.

## 7. Charge mobility measurement

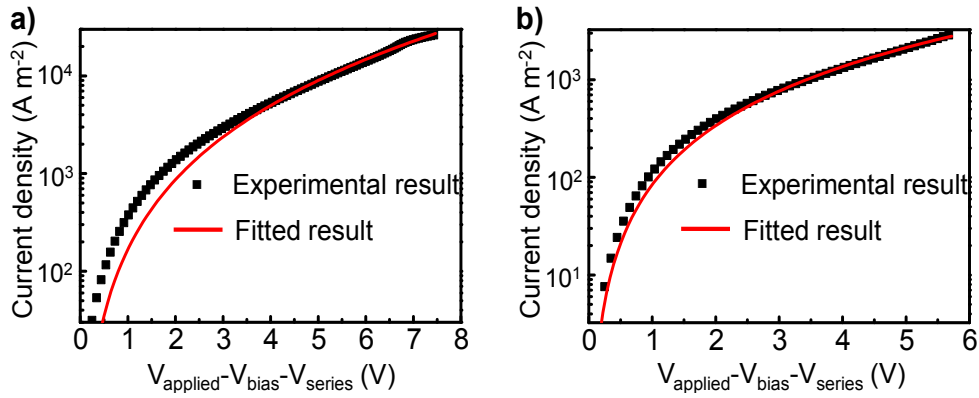

**Figure S7.** J-V curves and SCLC fitting of a) the hole-only device and b) electron-only device of the PTB7-Th:M-BNBP4P-1 blend film.

Charge carrier mobilities of the PTB7-Th:M-BNBP4P-1 blend were measured based on the SCLC method with the hole-only device (ITO/PEDOT:PSS/active layer/Al) and electron-only device (ITO/PEIE/active layer/Ca/Al). The  $J$ - $V$  curves were fitted to a space-charge-limited function:

$$J = \frac{9\varepsilon_0\varepsilon_r\mu_0V^2}{8L^3} \exp\left(0.89\beta\sqrt{\frac{V}{L}}\right) \quad (1)$$

where  $J$  is the current density,  $L$  is the film thickness of the active layer,  $\mu_0$  is the charge mobility,  $\varepsilon_r$  is the relative dielectric constant of the transport medium,  $\varepsilon_0$  is the permittivity of free space,  $V$  ( $V_{\text{appl}} - V_{\text{bi}}$ ) is the internal voltage in the device, where  $V_{\text{appl}}$

is the applied voltage to the device and  $V_{bi}$  is the built-in voltage due to the relative work function difference of the two electrodes. The hole and electron mobilities are estimated to be  $6.87 \times 10^{-4} \text{ cm}^2 \text{ V}^{-1} \text{ s}^{-1}$  and  $1.47 \times 10^{-4} \text{ cm}^2 \text{ V}^{-1} \text{ s}^{-1}$ , respectively. The high and balanced hole/electron mobilities of the blend are in agreement with the high OSCs performance.

## 8. $J_{sc}$ versus light intensity

The dependence of short-circuit current on the light intensity was measured to study charge recombination in the OSC devices. As reported, the  $J_{sc}$  follows a power-law dependence on the illumination intensity ( $J_{sc} \propto P_{\text{light}}^\alpha$ , where  $P_{\text{light}}$  is light intensity and  $\alpha$  is the calculated power-law exponent). If all free carriers are swept out and collected at the electrodes prior to recombination,  $\alpha$  should be equal to 1. In this work, the current density shows a linear dependence on the light intensity in logarithmic coordinates with a slope ( $\alpha$ ) of 0.98, indicating efficient sweep-out of carriers and well suppressed bimolecular recombination.

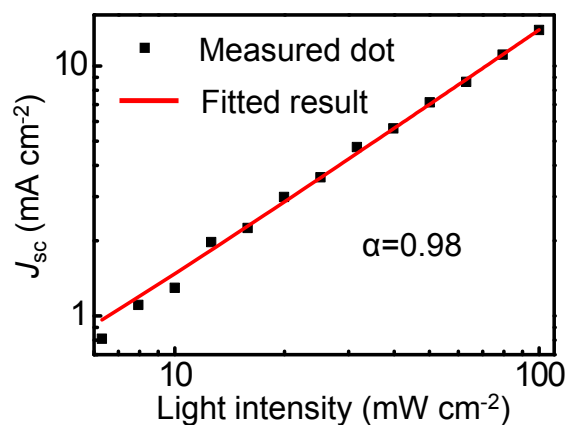

**Figure S8.**  $J_{sc}$  versus light intensity characteristic of the OSC device based on PTB7-Th:M-BNBP4P-1 blend.

## 9. $J_{\text{ph}}$ versus effective voltage

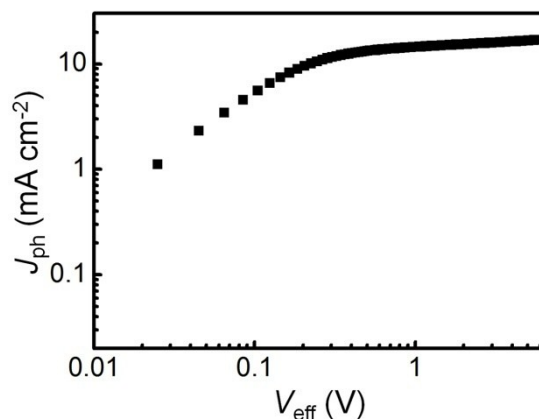

**Figure S9.** Photocurrent density ( $J_{\text{ph}}$ ) versus effective voltage ( $V_{\text{eff}}$ ) characteristic of the OSCs device based on PTB7-Th:**M-BNBP4P-1** blend.

The photocurrent density ( $J_{\text{ph}}$ ) versus the effective voltage ( $V_{\text{eff}}$ ) was measured to study the charge generation and extraction properties.  $J_{\text{ph}}$  can be defined as  $J_{\text{ph}} = J_{\text{L}} - J_{\text{D}}$ , where  $J_{\text{L}}$  and  $J_{\text{D}}$  are the photocurrent densities under illumination and in the dark, respectively.  $V_{\text{eff}}$  can be defined as  $V_{\text{eff}} = V_{\text{oc}} - V_{\text{bias}}$ , where  $V_{\text{oc}}$  is the voltage at which the photocurrent is zero and  $V_{\text{bias}}$  is the applied voltage. Therefore,  $V_{\text{eff}}$  determines the electric field in the bulk region and thereby affects the carrier transport and the photocurrent extraction. The plot of  $J_{\text{ph}}$  versus  $V_{\text{eff}}$  is presented in Figure S7. At high  $V_{\text{eff}}$  values, mobile charge carriers rapidly move toward the corresponding electrodes with minimal recombination.  $J_{\text{ph}}$  reaches saturation ( $15.58 \text{ mA cm}^{-2}$ ) at  $V_{\text{eff}} \geq 2.5 \text{ V}$ , suggesting that all photogenerated excitons are dissociated into free charge carriers and charge carriers are collected at the electrodes very efficiently. Under short-circuit condition,  $J_{\text{ph}}$  is  $14.62 \text{ mA cm}^{-2}$ , which is  $\sim 94\%$  of all photogenerated carriers collected by the electrodes, indicating efficient photogenerated exciton dissociation and charge collection for PTB7-Th:**M-BNBP4P-1** device.

## 10. Chemical structure of PTB7-Th

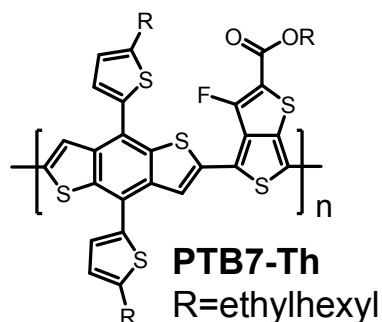

## 11. The absorption spectrum of blend film

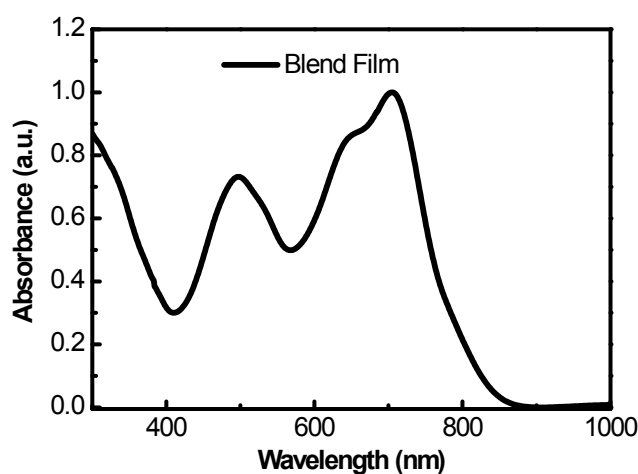

**Figure S10.** The absorption spectrum of PTB7-Th:M-BNBP4P-1 blend film.

## 12. References

1. C. Dou, X. Long, Z. Ding, Z. Xie, J. Liu, L. Wang, An Electron-Deficient Building Block Based on the B-N Unit: An Electron Acceptor for All-Polymer Solar Cells. *Angewandte Chemie International Edition*. **2016**, *55*, 1436-1440; *Angewandte Chemie*, **2016**, *128*, 1458-1462.
2. Q. Zhang, B. Kan, F. Liu, G. Long, X. Wan, X. Chen, Y. Zuo, W. Ni, H. Zhang, M. Li, Z. Hu, F. Huang, Y. Cao, Z. Liang, M. Zhang, T.-P. Russell, Y. Chen, Small-molecule Solar Cells with Efficiency over 9%. *Nature Photonics*, **2014**, *9*, 35-41.
